# Supplementary material for: IRimage: open source software for processing images from infrared thermal cameras
Source: PubMed Central journal article supplement (PMC9138121; doi:10.7717/peerj-cs.977), 2022-05-10
Supplement: peerj-cs-08-977-s001.pdf [file peerj-cs-08-977-s001.pdf]

**Table S1. List of images used for the comparison between IRimage and FLIR Tools.** Images were all those found in Wikimedia Commons taken with FLIR cameras and available as unmodified JPG files. Images were downloaded on 16 Jun 2019 from [https://commons.wikimedia.org/wiki/Category:Photos\\_taken\\_with\\_FLIR\\_Systems](https://commons.wikimedia.org/wiki/Category:Photos_taken_with_FLIR_Systems)

| #  | Image name                                                                               | Camera model    | Author                      | License       |
|----|------------------------------------------------------------------------------------------|-----------------|-----------------------------|---------------|
| 1  | 200 deg neutral                                                                          | ThermaCAM SC640 | Basicinfrared               | CC0           |
| 2  | IRWaterCooler                                                                            | InfraCAM Wester | Eclipse sx                  | CC-BY-3.0     |
| 3  | Thermal image of four ducks swimming                                                     | FLIR i7         | Zaereth                     | CC0           |
| 4  | AFCIs Infrared                                                                           | FLIR C2         | Tenbergen                   | CC-BY-SA-4.0  |
| 5  | Aqua Tower thermal image                                                                 | Flir b60        | Russ Miller- Johnson        | CC0           |
| 6  | Aqua Tower thermal imaging                                                               | Flir b60        | Jim D' Aloisio              | CC0           |
| 7  | BillHotFlashThermography                                                                 | ThermaCAM EX320 | Hotflashhome                | CC-BY-SA-3.0  |
| 8  | Image thermique de l'émission d'un radiateur à travers un mur                            | FLIR E30bx      | Hugues Crepin               | CC-BY-SA-3.0  |
| 9  | Infrared image of people in the laboratory                                               | FLIR i60        | Tomasz Kawalec              | CC-BY-SA-4.0  |
| 10 | IR Fussbodenheizung                                                                      | ThermaCAM SC640 | Herbertweidner              | CC0           |
| 11 | IR moving car                                                                            | FLIR E60        | Herbertweidner              | CC0           |
| 12 | IR moving mercedes                                                                       | FLIR E60        | Herbertweidner              | CC0           |
| 13 | IRWater                                                                                  | FLIR E60        | Eclipse sx                  | CC-BY-SA-3.0  |
| 14 | Kujawy wiatrak                                                                           | FLIR T440       | Tadmark5364                 | CC-BY-4.0     |
| 15 | Linear load                                                                              | InfraCAM Wester | Basicinfrared               | CC0           |
| 16 | Man in water - IR image                                                                  | FLIR P640       | Krzysztof Jakucy            | CC-BY-SA-3.0  |
| 17 | Solar halo thermal                                                                       | FLIR T420       | Разрывные                   | public domain |
| 18 | Steam Train Valves Thermal Image                                                         | FLIR T420       | Christopher A.S. Harvey     | CC-BY-SA-4.0  |
| 19 | Termografía                                                                              | InfraCAM Wester | Gemmaburt                   | CC-BY-SA-4.0  |
| 20 | Thermal image of a group of grey-headed flying foxes during an extreme temperature event | FLIR E60bx      | Justin Welbergen            | CC-BY-SA-3.0  |
| 21 | Thermal image of a juvenile grey-headed flying fox during an extreme temperature event   | FLIR E60bx      | Justin Welbergen            | CC-BY-SA-3.0  |
| 22 | Thermogramme infiltrométrie                                                              | FLIR B360       | DanFernbanck                | CC-BY-SA-4.0  |
| 23 | Thermographie de rue                                                                     | FLIR E30bx      | Hugues Crepin               | CC-BY-SA-3.0  |
| 24 | Thermographie photovoltaïque                                                             | FLIR E30bx      | Hugues Crepin               | CC-BY-SA-3.0  |
| 25 | Videocamera Termica                                                                      | FLIR E40        | Carla Vacchi                | CC-BY-SA-4.0  |
| 26 | Windmill Thermal Image                                                                   | FLIR E60        | Black Hills Thermal Imaging | CC-BY-SA-3.0  |
